# Supplementary material for: Trio-based GWAS identifies novel associations and subtype-specific risk factors for cleft palate
Source: PubMed Central journal article supplement — HGG Adv. 2023 Aug 25;4(4):100234. doi: 10.1016/j.xhgg.2023.100234 (PMC10502411; doi:10.1016/j.xhgg.2023.100234), 2023-08-25
Supplement: mmc1.pdf [file mmc1.pdf]

## **Supplemental information**

### **Trio-based GWAS identifies novel associations and subtype-specific risk factors for cleft palate**

**Kelsey Robinson, Trenell J. Mosley, Kenneth S. Rivera-González, Christopher R. Jabbarpour, Sarah W. Curtis, Wasiu Lanre Adeyemo, Terri H. Beaty, Azeez Butali, Carmen J. Buxó, David J. Cutler, Michael P. Epstein, Lord J.J. Gowans, Jacqueline T. Hecht, Jeffrey C. Murray, Gary M. Shaw, Lina Moreno Uribe, Seth M. Weinberg, Harrison Brand, Mary L. Marazita, Robert J. Lipinski, and Elizabeth J. Leslie**

Supplemental Information – Table of Contents

|                                                                 |   |
|-----------------------------------------------------------------|---|
| Figure S1 – Principal Components for Genetic Ancestry .....     | 2 |
| Figure S2 – Asian-Ancestry Specific Analysis .....              | 3 |
| Figure S3 – Any Cleft Palate Manhattan & QQplots .....          | 4 |
| Figure S4 – Soft Cleft Palate Manhattan & QQplots.....          | 4 |
| Figure S5 – Hard Cleft Palate Manhattan & QQplots .....         | 4 |
| Table S1 – Case Description by sex and self-reported race ..... | 5 |
| Table S2 – <i>Angptl2</i> gene-specific primers .....           | 5 |
| Table S3 – RT-qPCR primers.....                                 | 5 |

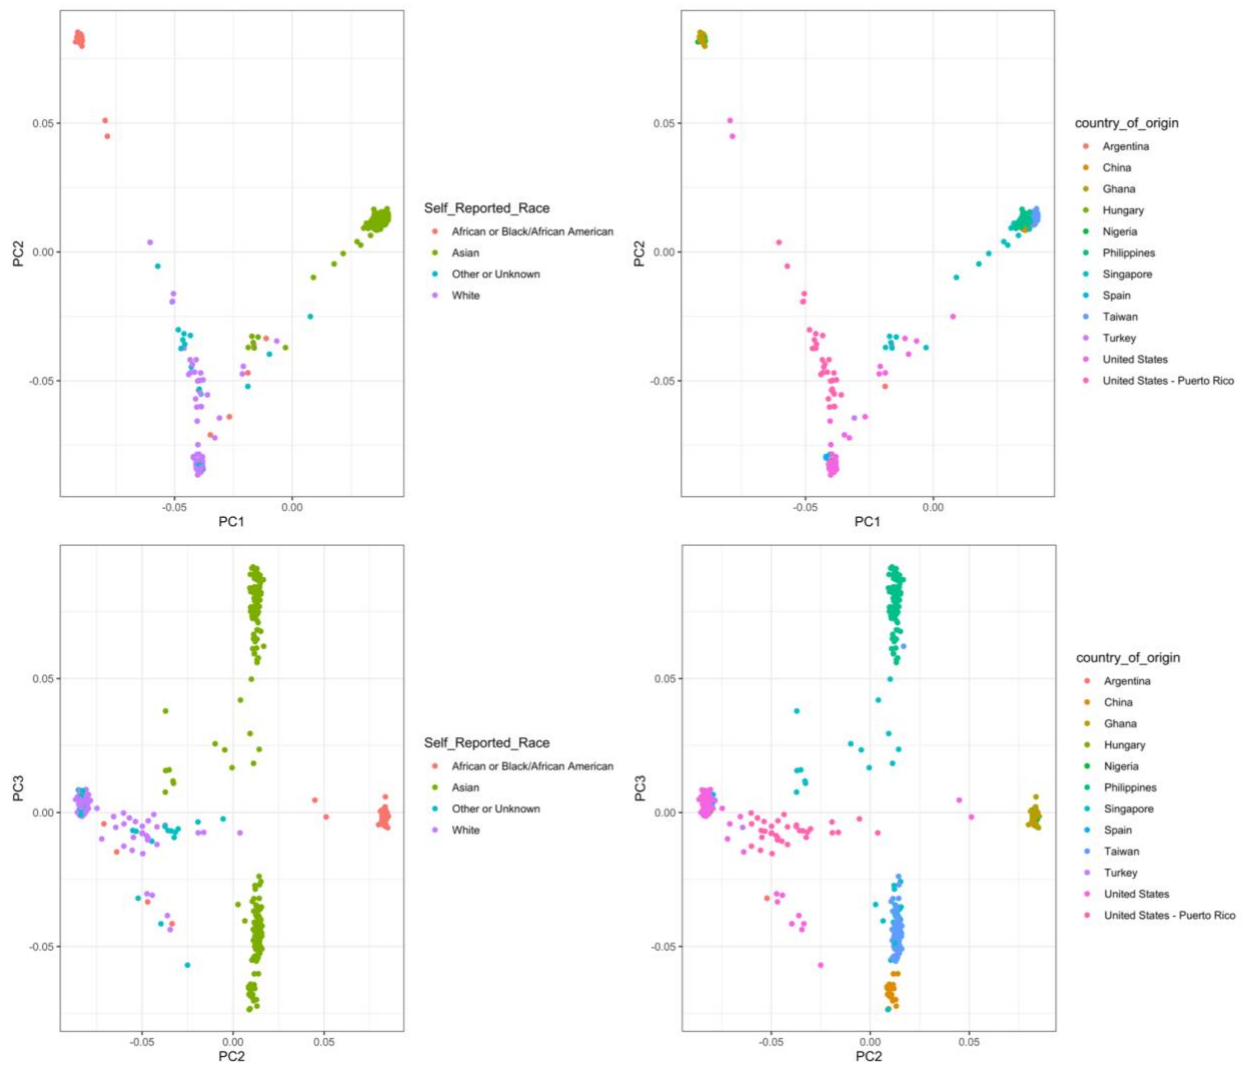

Figure S1: Principal components 1 vs 2 (top) and 2 vs 3 (bottom) demonstrating group separation by self-reported race and by country of origin.

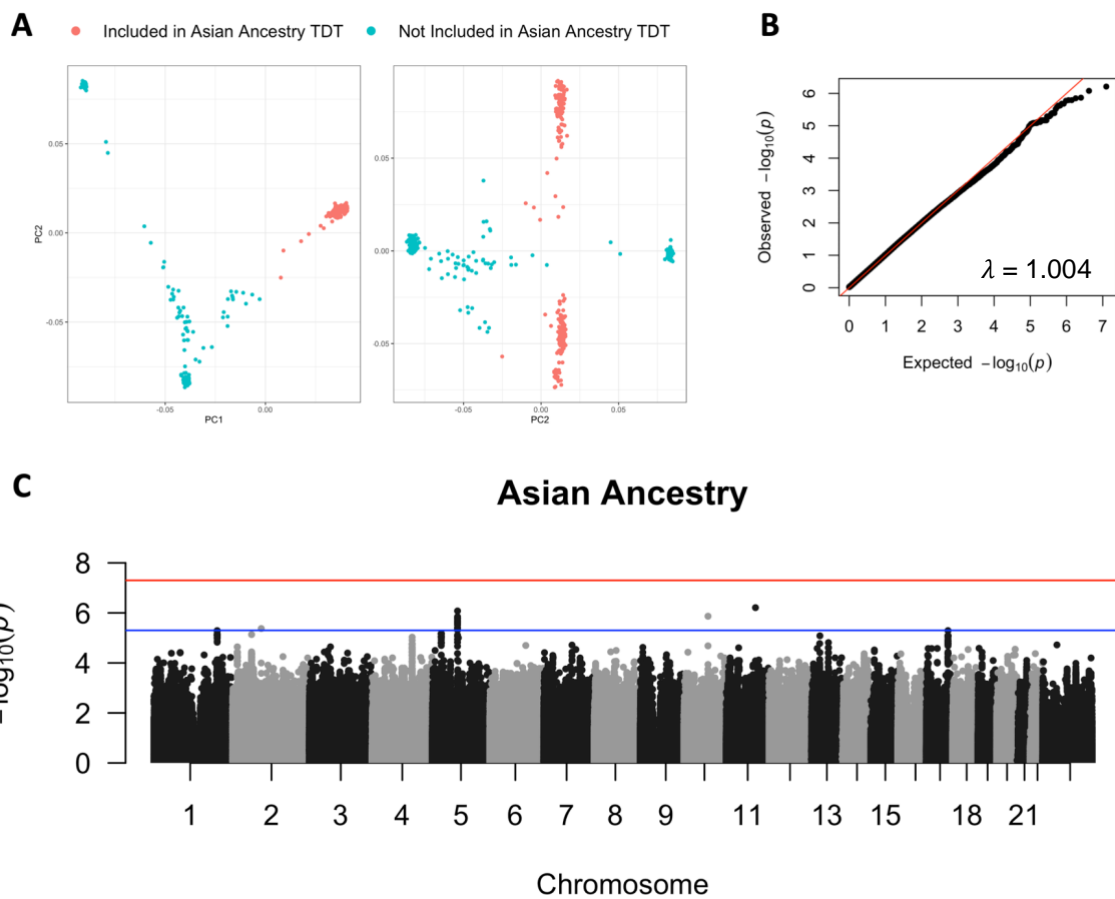

Figure S2: A) Asian ancestry as determined by PC grouping – pink dots represent probands of Asian descent ( $n=262$ ). B) qqplot for Asian ancestry-specific TDT. C) Manhattan plot for proband analysis. The blue line represents the suggestive threshold ( $5 \times 10^{-6}$ ) and the red line represents genome-wide significance ( $5 \times 10^{-7}$ ).

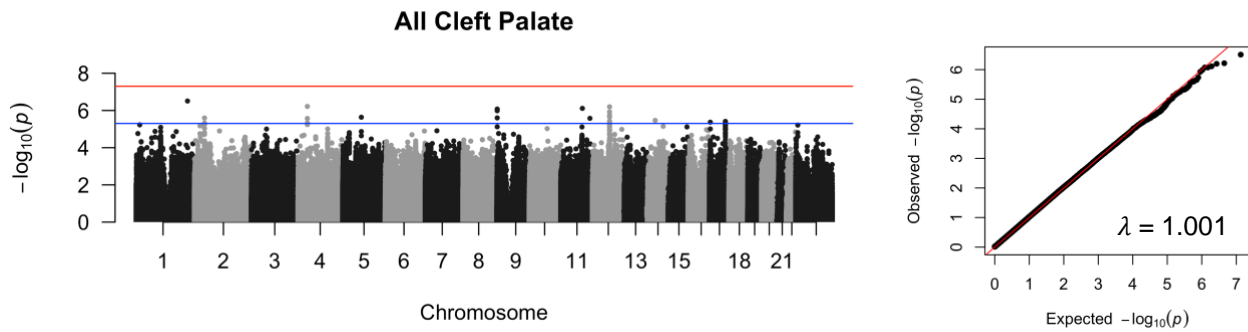

Figure S3: Manhattan plot (left) and qqplot (right) for the ACP analysis. The blue line represents the suggestive threshold ( $5 \times 10^{-6}$ ) and the red line represents genome-wide significance ( $5 \times 10^{-8}$ ).

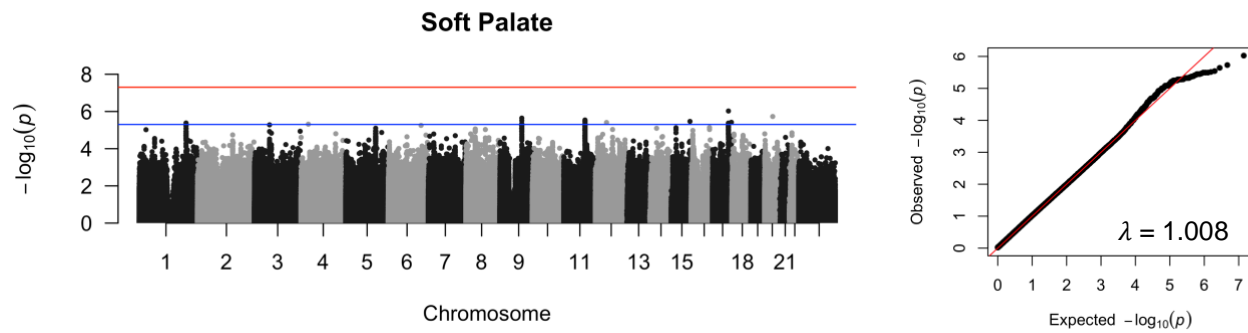

Figure S4: Manhattan plot (left) and qqplot (right) for the CSP analysis. The blue line represents the suggestive threshold ( $5 \times 10^{-6}$ ) and the red line represents genome-wide significance ( $5 \times 10^{-8}$ ).

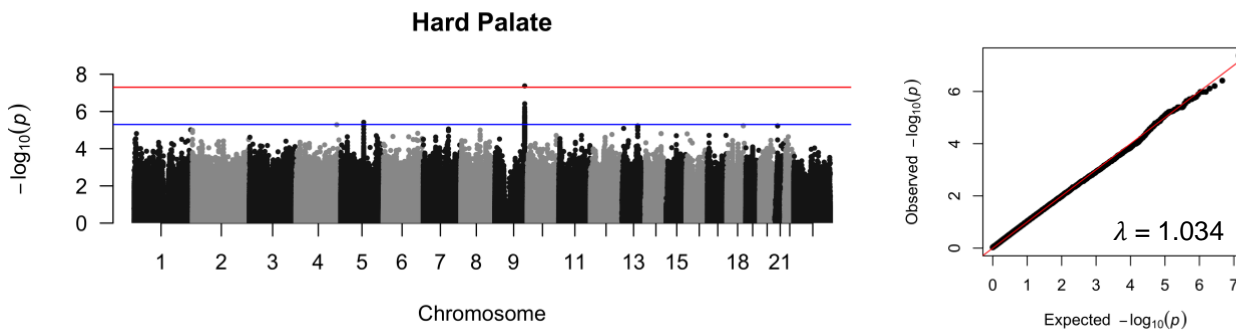

Figure S5: Manhattan plot (left) and qqplot (right) for the CHP analysis. The blue line represents the suggestive threshold ( $5 \times 10^{-6}$ ) and the red line represents genome-wide significance ( $5 \times 10^{-8}$ ).

| Cleft Type        | Male   |                        |       |       |         |              |
|-------------------|--------|------------------------|-------|-------|---------|--------------|
|                   | Asian  | Black/African American | White | Other | Unknown | Total Male   |
| Both              | 20     | 6                      | 8     | 1     | 3       | 38           |
| CP - Type Unknown | 20     | 8                      | 10    | 0     | 9       | 47           |
| Hard Palate       | 16     | 0                      | 3     | 0     | 0       | 19           |
| SMCP              | 2      | 6                      | 6     | 0     | 0       | 14           |
| Soft Palate       | 37     | 3                      | 13    | 0     | 2       | 55           |
| Total Male        | 95     | 23                     | 40    | 1     | 14      | 173          |
| Cleft Type        | Female |                        |       |       |         |              |
|                   | Asian  | Black/African American | White | Other | Unknown | Total Female |
| Both              | 31     | 2                      | 8     | 0     | 3       | 44           |
| CP - Type Unknown | 38     | 24                     | 15    | 0     | 9       | 86           |
| Hard Palate       | 21     | 0                      | 3     | 0     | 0       | 24           |
| SMCP              | 3      | 7                      | 1     | 0     | 0       | 11           |
| Soft Palate       | 71     | 5                      | 14    | 1     | 6       | 97           |
| Total Female      | 164    | 38                     | 41    | 1     | 18      | 262          |
| Total Cases       | 259    | 61                     | 81    | 2     | 32      | 435          |

**Table S1: Case Description by sex and self-reported race**

| Gene/Direction                  | Sequence                                         |
|---------------------------------|--------------------------------------------------|
| <i>Angptl2</i> -fwd             | CTGCAGAGTCTCCAATCAG                              |
| <i>Angptl2</i> -rev + T7 leader | CGATGTTAATACGACTCACTATAGGGATTCTGTGGAGGCTAAAGTATG |

**Table S2: *Angptl2* gene-specific primers**

| Gene/Direction      | Sequence               |
|---------------------|------------------------|
| <i>Gapdh</i> -fwd   | AACACTGAGCATCTCCCTCACA |
| <i>Gapdh</i> -rev   | GGTGGGTGCAGCGAACTTTATT |
| <i>Angptl2</i> -fwd | TCTCTGTCCCTACTGCGTTCTT |
| <i>Angptl2</i> -rev | GGCGATATTGGCAGTTGTGTCT |
| <i>Runx2</i> -fwd   | GGACCCACACAGCCATGTAAA  |
| <i>Runx2</i> -rev   | GGCAACGTTCCCTAACCTGAAA |

**Table S3: RT-qPCR primers**
